# Supplementary material
Source: Springer Nature journal article supplement (https://www.springermedizin.de/resource/supplementary/12943_2007_278_MOESM3_ESM.pdf/9553840)

CDKN2A EX2

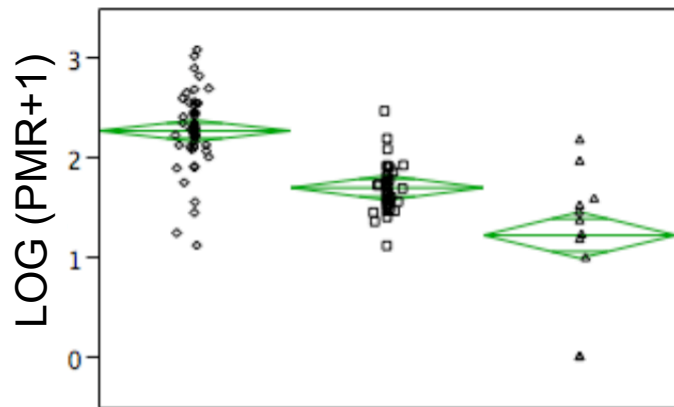

CDX2

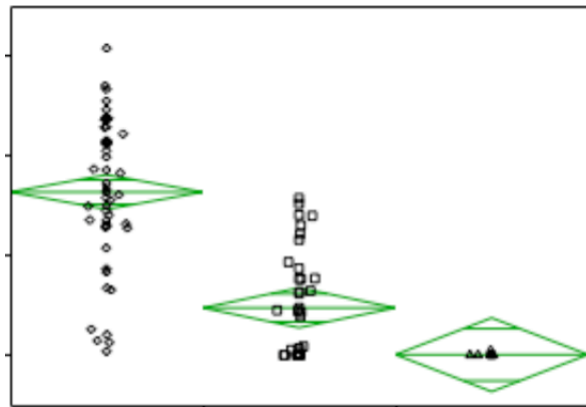

HOXA1

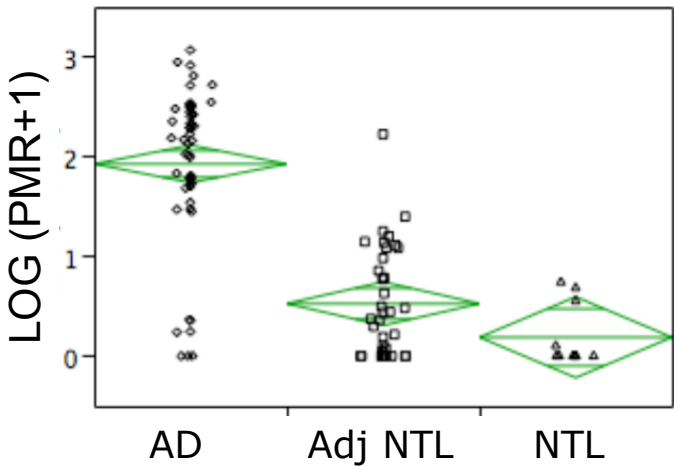

OPCML

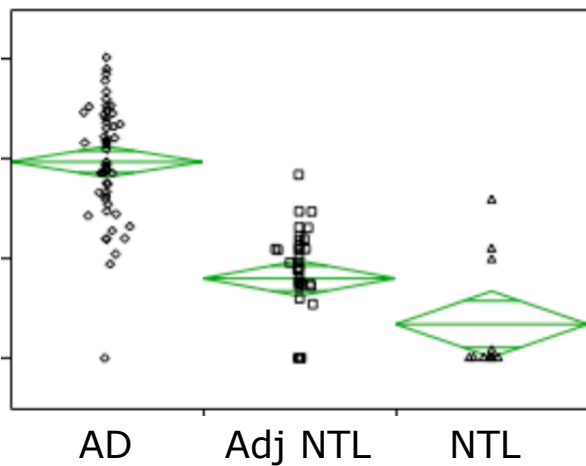

Supplement: MOESM3 [file 9553840]
